# Supplementary material for: Tempo and Mode of Transposable Element Activity in Drosophila
Source: PubMed Central journal article supplement (PMC4505896; doi:10.1371/journal.pgen.1005406), 2015-07-17
Supplement: pgen.1005406.s012.pdf [file pgen.1005406.s012.pdf]

Table 1: Nucleotide polymorphism in the natural *D. melanogaster* (*D.mel.*) and *D. simulans* (*D.sim.*) populations. From genomic regions being present in both assemblies (both assemblies) we successively removed low recombining regions (<1 cM/Mb; excl. low. rec) and regions overlapping with exons (excl. coding).

|              | both assembl. |               | excl. low. rec. |               | excl. coding  |               |
|--------------|---------------|---------------|-----------------|---------------|---------------|---------------|
|              | <i>D.mel.</i> | <i>D.sim.</i> | <i>D.mel.</i>   | <i>D.sim.</i> | <i>D.mel.</i> | <i>D.sim.</i> |
| whole genome | 0.0061        | 0.0104        | 0.0068          | 0.0108        | 0.0070        | 0.0107        |
| X            | 0.0052        | 0.0077        | 0.0053          | 0.0082        | 0.0056        | 0.0086        |
| 2L           | 0.0072        | 0.0115        | 0.0080          | 0.0121        | 0.0081        | 0.0119        |
| 2R           | 0.0063        | 0.0108        | 0.0070          | 0.0109        | 0.0070        | 0.0107        |
| 3L           | 0.0067        | 0.0116        | 0.0078          | 0.0118        | 0.0080        | 0.0117        |
| 3R           | 0.0055        | 0.0108        | 0.0064          | 0.0112        | 0.0067        | 0.0108        |
| 4            | 0.0012        | 0.0014        | -               | -             | -             | -             |
| autosomes    | 0.0063        | 0.0110        | 0.0072          | 0.0115        | 0.0074        | 0.0113        |

## Nucleotide polymorphism

We estimated the nucleotide polymorphism in the natural *D. melanogaster* and *D. simulans* populations with a sliding window approach, using non-overlapping windows of 1 kb (see material and methods in main manuscript). Subsequently we (i) filtered for regions being present in both assemblies, (ii) excluded regions with low recombination rates (< 1 cM/Mb) in *D. melanogaster* and (iii) excluded windows overlapping with an exon (Table 1). Based on the level of polymorphism in the autosomes we estimate that the  $N_e$  of *D. simulans* is approximately 1.519 (= 0.011285/0.007429) times higher than the  $N_e$  of *D. melanogaster*.
